# Supplementary material
Source: publisher figshare collection journal article supplement (https://future-science-group.figshare.com/ndownloader/files/34123182)
Supplement: Supplementary file 1 [file 34123182]

**Supplementary file for review**

**
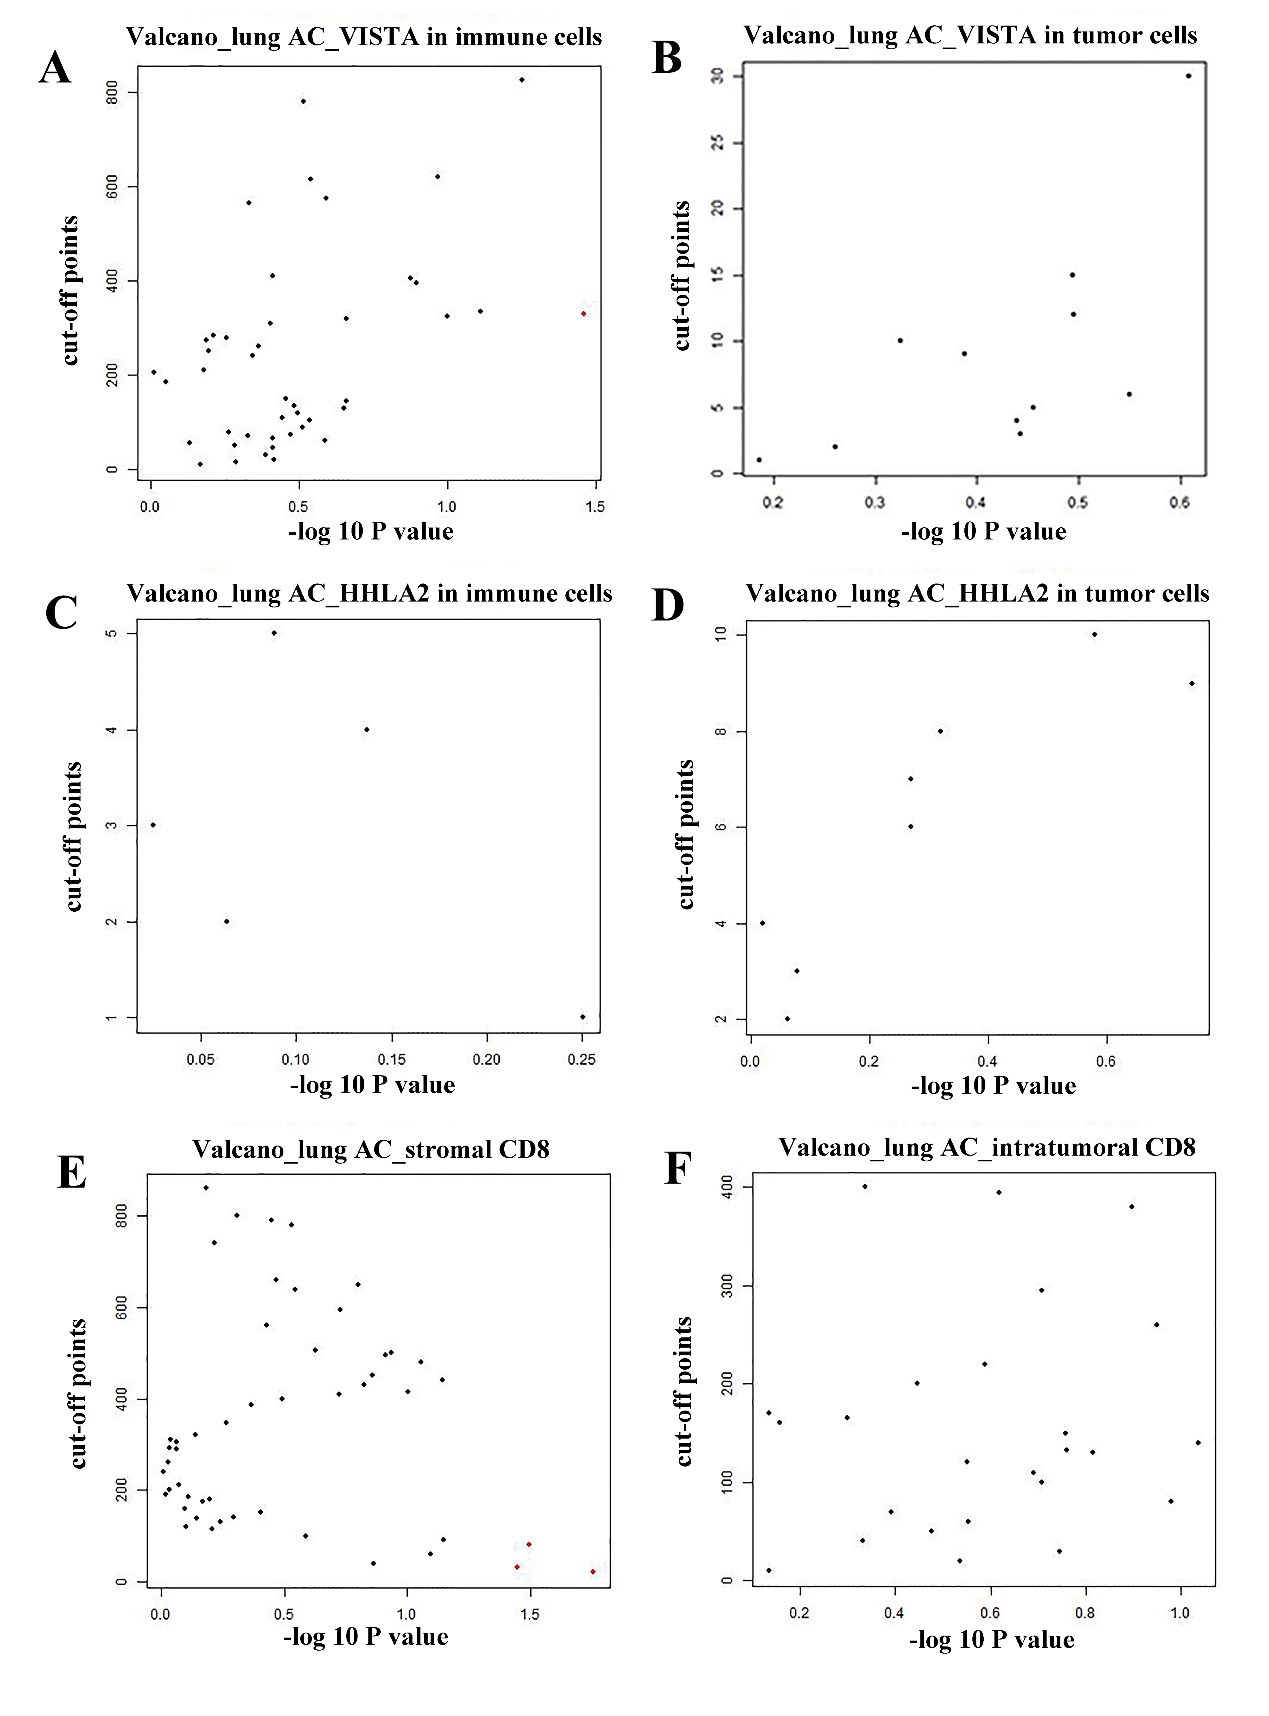
**

**Figure. S1 Volcano plots to determine cut-off points for biomarkers.**


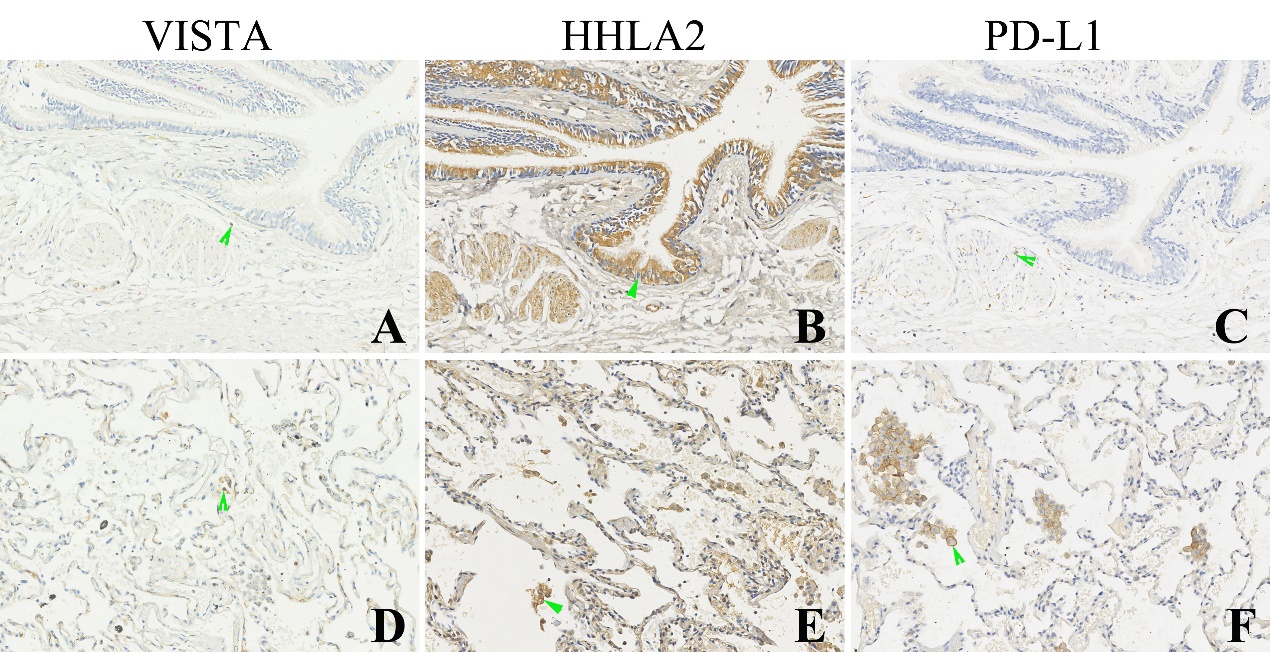


**Figure. S2 Expression of VISTA, HHLA2 and PD-L1 proteins in the adjacent noncancerous lung tissues.** VISTA and PD-L1 expression was negative in the bronchial epithelium, but HHLA2 expression was positive in the bronchial epithelium (green arrow head showed) and smooth muscle cells. The three proteins could express in the immune cells such as lymphocytes and macrophages (green arrow head showed)(original magnification A-F ×200 **)**.

**
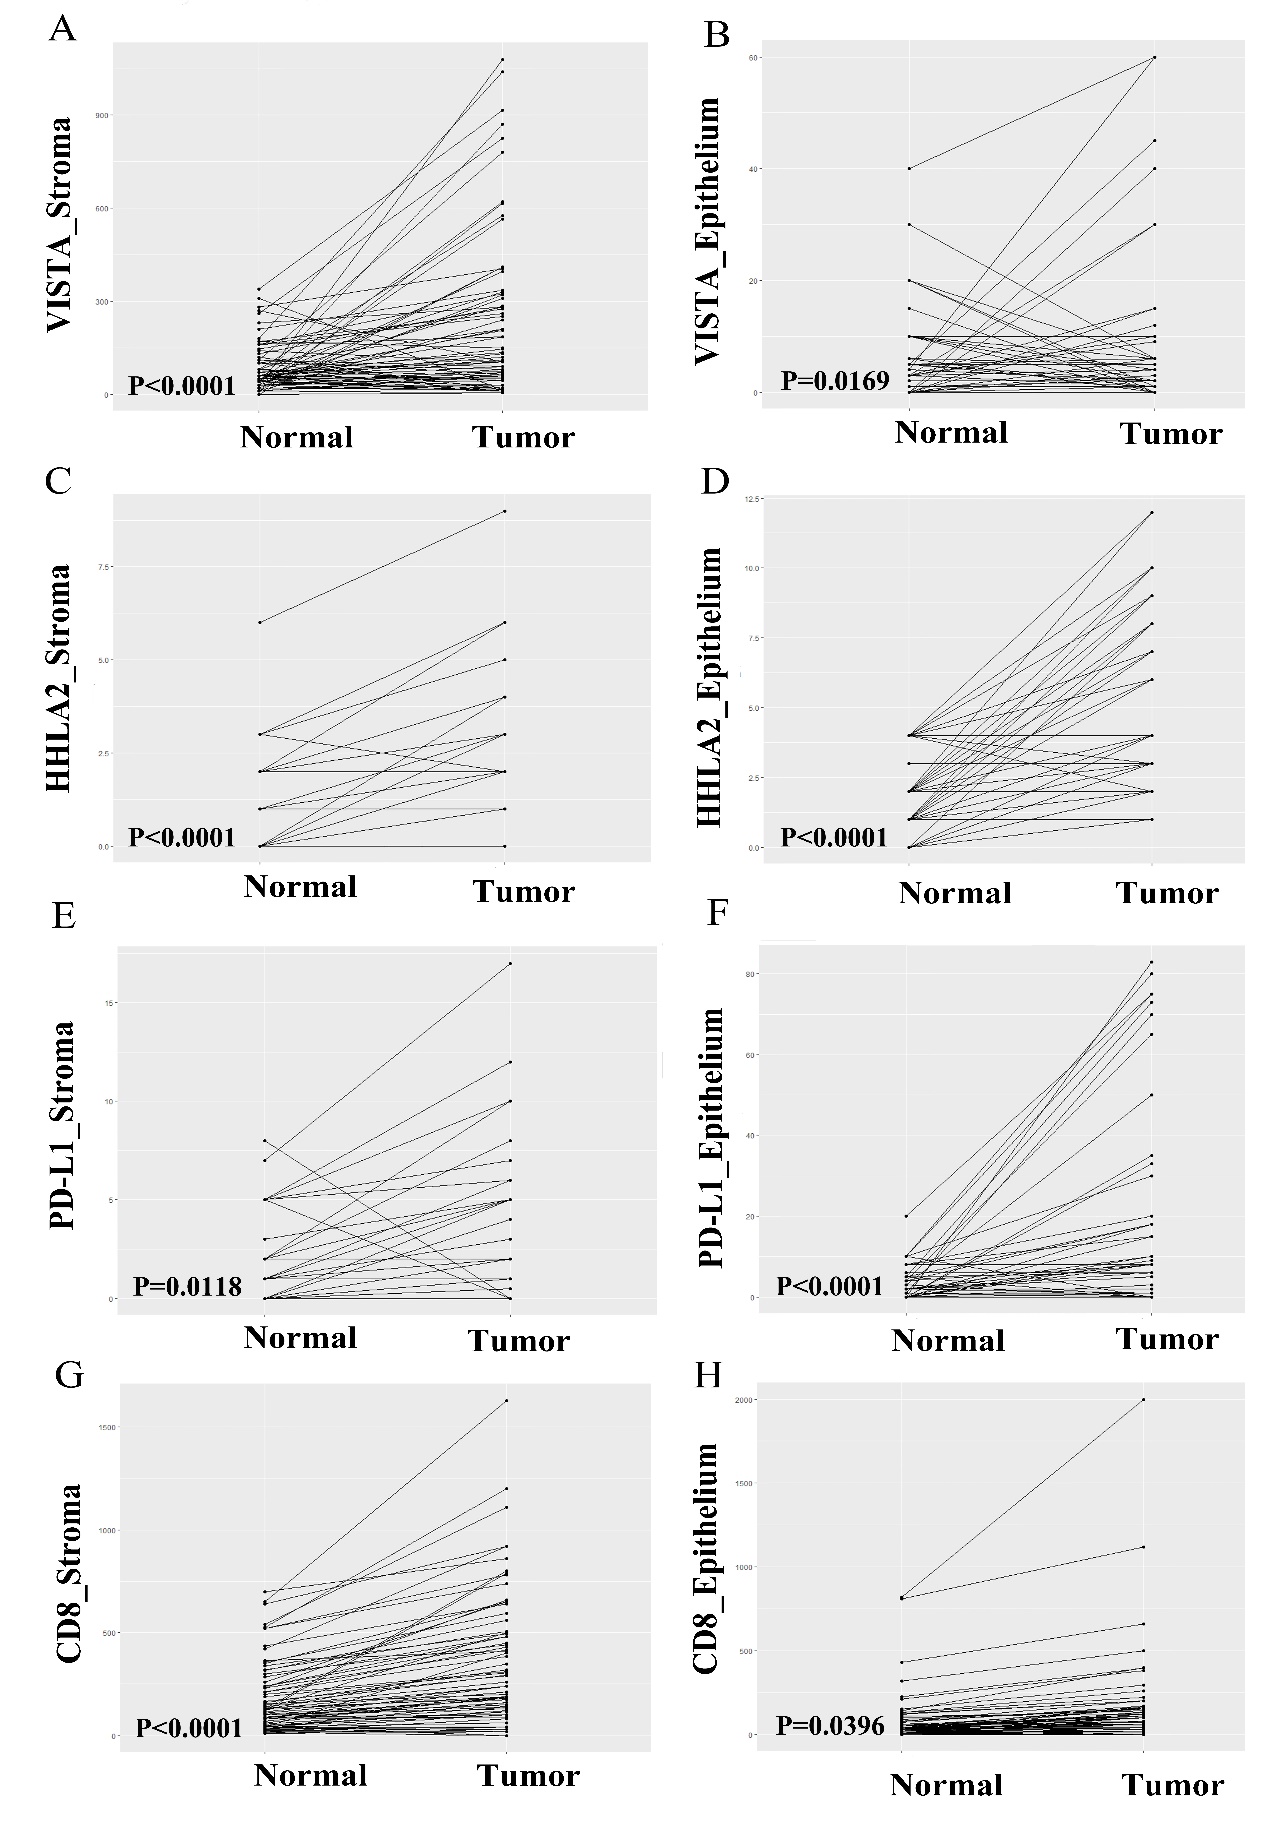
**

**Figure.S3 Comparison of immune biomarkers expression trends between tumor and corresponding normal tissues.**

**
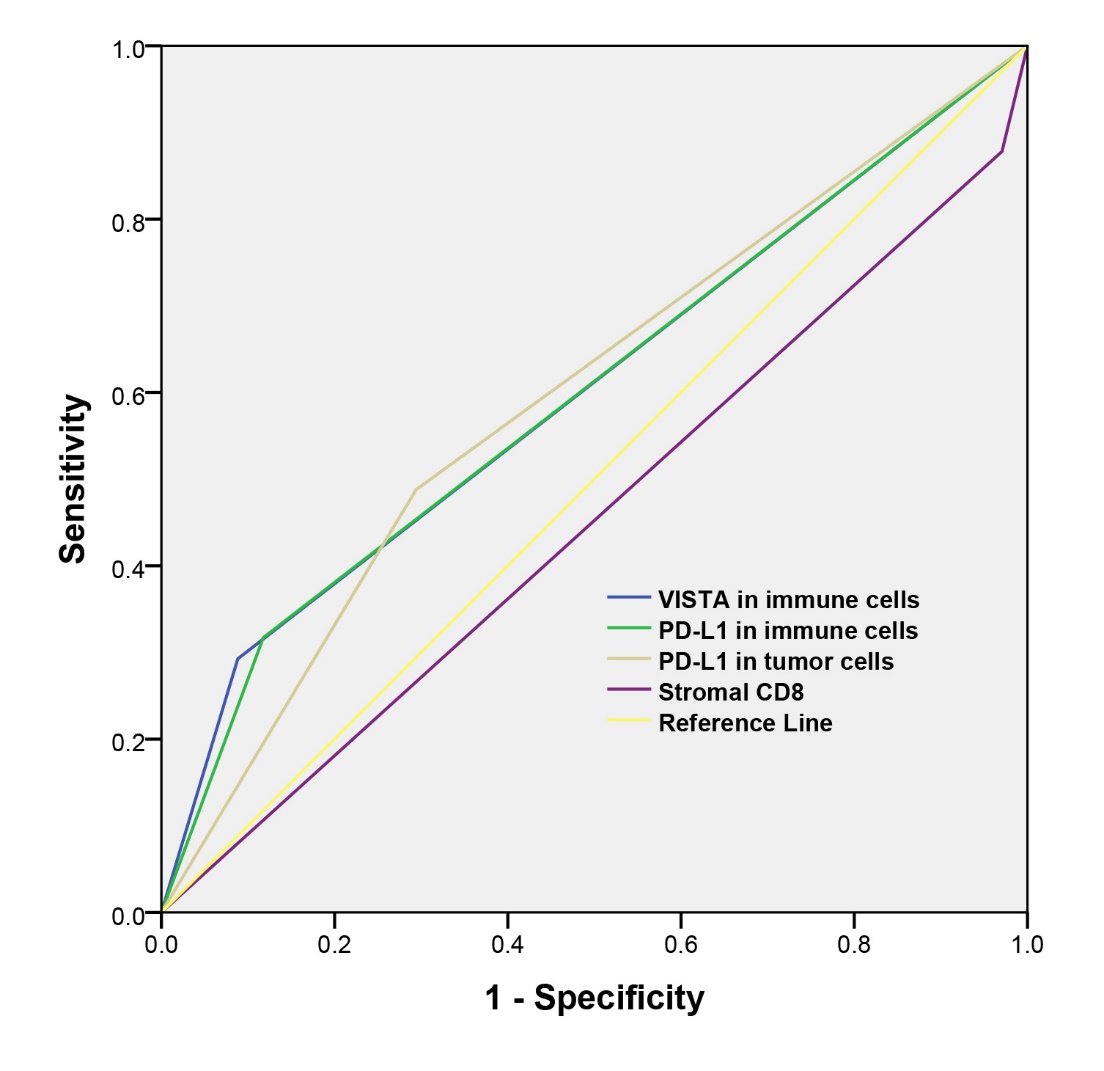
**

**Figure. S4 ROC analysis of immune biomarkers by overall survival.**

**Supplementary table 1.Volcano Plots to determine cut-off points for biomarkers.**

| Biomarkers | LUAD cohort | |  |
| --- | --- | --- | --- |
| Cut-off point | Minimum *P* value |  |
| **VISTA in immune cells** | 330 | 0.034798 |  |
| **VISTA in tumor cells** | 30 | 0.246693 |  |
| **HHLA2 in immune cells** | 1 | 0.561902 |  |
| **HHLA2 in tumor cells** | 9 | 0.180455 |  |
| **Stromal CD8** | 20 | 0.017497 |  |
| **Intratumoral CD8** | 140 | 0.092036 |  |

**Supplementary table 2. Spearman rank correlation between VISTA, HHLA2, PD-L1 and CD8+ T cell infiltration in the LUAD patients.**

| **Tumor types** | **VISTA in IC** | **VISTA in TC** | **HHLA2 in IC** | **HHLA2 in TC** | **PD-L1 in IC** | **PD-L1 in TC** | **Stromal CD8** | **Intratumoral CD8** |
| --- | --- | --- | --- | --- | --- | --- | --- | --- |
| **VISTA in IC** | *1(NA)* | ***0.509(P<0.001)*** | ***0.371(P=0.001)*** | *0.095(P=0.418)* | ***0.580(P<0.001)*** | ***0.320(P=0.005)*** | ***0.380(P<0.001)*** | ***0.469(P<0.001)*** |
| **VISTA in TC** | ***0.509(P<0.001)*** | *1(NA)* | *0.133(P=0.254)* | *0.139(P=0.234)* | ***0.274(P=0.017)*** | ***0.282(P=0.014)*** | *0.042(P=0.718)* | *0.178(P=0.127）* |
| **HHLA2 in IC** | ***0.371(P=0.001)*** | *0.133(P=0.254)* | *1(NA)* | ***0.334(P=0.003)*** | ***0.296(P=0.010)*** | *0.027(P=0.817)* | *0.184(P=0.114)* | *0.209(P=0.072)* |
| **HHLA2 in TC** | *0.095(P=0.418)* | *0.139(P=0.234)* | ***0.334(P=0.003)*** | *1(NA)* | *0.073(P=0.536)* | *0.003(P=0.980)* | *-0.044(P=0.705)* | *0.207(P=0.074)* |
| **PD-L1 in IC** | ***0.580(P<0.001)*** | ***0.274(P=0.017)*** | ***0.296(P=0.010)*** | *0.073(P=0.536)* | *1(NA)* | ***0.379(P=0.001)*** | *0.189(P=0.105)* | ***0.393(P<0.001)*** |
| **PD-L1 in TC** | ***0.320(P=0.005)*** | ***0.282(P=0.014)*** | *0.027(P=0.817)* | *0.003(P=0.980)* | ***0.379(P=0.001)*** | *1(NA)* | *0.165(P=0.157)* | ***0.379(P=0.001)*** |
| **Stromal CD8** | ***0.380(P<0.001)*** | *0.042(P=0.718)* | *0.184(P=0.114)* | *-0.044(P=0.705)* | *0.189(P=0.105)* | *0.165(P=0.157)* | *1(NA)* | ***0.500(P<0.001)*** |
| Intratumoral CD8 | ***0.469(P<0.001)*** | *0.178(P=0.127）* | *0.209(P=0.072)* | *0.207(P=0.074)* | ***0.393(P<0.001)*** | ***0.379(P=0.001)*** | ***0.500(P<0.001)*** | *1(NA)* |
